# Supplementary material for: Effects of Lactobacillus salivarius isolated from feces of fast-growing pigs on intestinal microbiota and morphology of suckling piglets
Source: PubMed Central journal article supplement (PMC7990948; doi:10.1038/s41598-021-85630-7), 2021-03-24
Supplement: 41598_2021_85630_MOESM2_ESM.pdf [file 41598_2021_85630_MOESM2_ESM.pdf]

Effects of *Lactobacillus salivarius* isolated from feces of fast-growing pigs on intestinal microbiota and morphology of suckling piglets Joseph Moturi, Kwang Yeol Kim, Abdolreza Hosseindoust, Min Ju Kim, Jun Hyung Lee, Biao Xuan, Jong Bin Park, Eun Bae Kim, and Byung Jo Chae

Correspondence Dr. B.J. Chae, Department of Animal Life Science, Kangwon National University, Chuncheon, 24341, Republic of Korea. Tel.: +82-33-250-8616; Fax: +82-33-244-4946, E-mail: bjchae@kangwon.ac.kr

| Group      |                                                                                 | G0001 | G0001 |
|------------|---------------------------------------------------------------------------------|-------|-------|
| Individual |                                                                                 | s001  | s002  |
| L2         | k__Archaea;p__Euryarchaeota                                                     | 0.01  | 0.01  |
| L2         | k__Bacteria;p__Acidobacteria                                                    | 0     | 0     |
| L2         | k__Bacteria;p__Actinobacteria                                                   | 0.72  | 0.2   |
| L2         | k__Bacteria;p__Bacteroidetes                                                    | 53.8  | 53.9  |
| L2         | k__Bacteria;p__Chlamydiae                                                       | 0     | 0     |
| L2         | k__Bacteria;p__Chloroflexi                                                      | 0     | 0     |
| L2         | k__Bacteria;p__Cyanobacteria                                                    | 0     | 0     |
| L2         | k__Bacteria;p__Deferribacteres                                                  | 0.01  | 0     |
| L2         | k__Bacteria;p__Elusimicrobia                                                    | 0     | 0     |
| L2         | k__Bacteria;p__Fibrobacteres                                                    | 0     | 0     |
| L2         | k__Bacteria;p__Firmicutes                                                       | 23.4  | 24    |
| L2         | k__Bacteria;p__Fusobacteria                                                     | 13.1  | 18.9  |
| L2         | k__Bacteria;p__LD1                                                              | 0     | 0     |
| L2         | k__Bacteria;p__Lentisphaerae                                                    | 0     | 0.01  |
| L2         | k__Bacteria;p__Planctomycetes                                                   | 0     | 0.01  |
| L2         | k__Bacteria;p__Proteobacteria                                                   | 8.88  | 2.81  |
| L2         | k__Bacteria;p__SR1                                                              | 0     | 0     |
| L2         | k__Bacteria;p__Spirochaetes                                                     | 0.04  | 0.03  |
| L2         | k__Bacteria;p__Synergistetes                                                    | 0     | 0.01  |
| L2         | k__Bacteria;p__TM6                                                              | 0     | 0     |
| L2         | k__Bacteria;p__TM7                                                              | 0     | 0     |
| L2         | k__Bacteria;p__Tenericutes                                                      | 0.02  | 0.08  |
| L2         | k__Bacteria;p__Verrucomicrobia                                                  | 0     | 0     |
| L2         | k__Bacteria;p__WPS-2                                                            | 0     | 0     |
| L2         | k__Bacteria;p__[Thermi]                                                         | 0     | 0     |
| L6         | k__Archaea;p__Euryarchaeota;c__Methanobacteria;o__Methanobacteriales;f__M       | 0     | 0     |
| L6         | k__Archaea;p__Euryarchaeota;c__Methanobacteria;o__Methanobacteriales;f__M       | 0.01  | 0.01  |
| L6         | k__Archaea;p__Euryarchaeota;c__Methanobacteria;o__Methanobacteriales;f__M       | 0     | 0     |
| L6         | k__Archaea;p__Euryarchaeota;c__Thermoplasmata;o__E2;f__[Methanomassiliicoc      | 0     | 0     |
| L6         | k__Bacteria;p__Acidobacteria;c__Acidobacteriia;o__Acidobacteriales;f__Acidobact | 0     | 0     |
| L6         | k__Bacteria;p__Acidobacteria;c__Holophagae;o__Holophagales;f__Holophagaceae     | 0     | 0     |
| L6         | k__Bacteria;p__Actinobacteria;c__Actinobacteria;o__Actinomycetales;f__;g__      | 0     | 0     |
| L6         | k__Bacteria;p__Actinobacteria;c__Actinobacteria;o__Actinomycetales;f__Actinom   | 0     | 0     |
| L6         | k__Bacteria;p__Actinobacteria;c__Actinobacteria;o__Actinomycetales;f__Actinom   | 0     | 0     |
| L6         | k__Bacteria;p__Actinobacteria;c__Actinobacteria;o__Actinomycetales;f__Actinom   | 0     | 0     |
| L6         | k__Bacteria;p__Actinobacteria;c__Actinobacteria;o__Actinomycetales;f__Actinom   | 0     | 0     |
| L6         | k__Bacteria;p__Actinobacteria;c__Actinobacteria;o__Actinomycetales;f__Actinom   | 0     | 0     |
| L6         | k__Bacteria;p__Actinobacteria;c__Actinobacteria;o__Actinomycetales;f__Beutenb   | 0     | 0     |
| L6         | k__Bacteria;p__Actinobacteria;c__Actinobacteria;o__Actinomycetales;f__Brevibac  | 0     | 0     |
| L6         | k__Bacteria;p__Actinobacteria;c__Actinobacteria;o__Actinomycetales;f__Coryneb   | 0.14  | 0.04  |



|    |                                                                                  |      |      |
|----|----------------------------------------------------------------------------------|------|------|
| L6 | k__Bacteria;p__Bacteroidetes;c__Bacteroidia;o__Bacteroidales;f__Bacteroidaceae   | 0    | 0    |
| L6 | k__Bacteria;p__Bacteroidetes;c__Bacteroidia;o__Bacteroidales;f__Bacteroidaceae   | 0    | 0    |
| L6 | k__Bacteria;p__Bacteroidetes;c__Bacteroidia;o__Bacteroidales;f__Bacteroidaceae   | 0    | 0    |
| L6 | k__Bacteria;p__Bacteroidetes;c__Bacteroidia;o__Bacteroidales;f__Bacteroidaceae   | 15.3 | 34.7 |
| L6 | k__Bacteria;p__Bacteroidetes;c__Bacteroidia;o__Bacteroidales;f__Porphyromonac    | 0.02 | 0    |
| L6 | k__Bacteria;p__Bacteroidetes;c__Bacteroidia;o__Bacteroidales;f__Porphyromonac    | 0    | 0    |
| L6 | k__Bacteria;p__Bacteroidetes;c__Bacteroidia;o__Bacteroidales;f__Porphyromonac    | 0    | 0    |
| L6 | k__Bacteria;p__Bacteroidetes;c__Bacteroidia;o__Bacteroidales;f__Porphyromonac    | 0.63 | 0.67 |
| L6 | k__Bacteria;p__Bacteroidetes;c__Bacteroidia;o__Bacteroidales;f__Porphyromonac    | 0    | 0    |
| L6 | k__Bacteria;p__Bacteroidetes;c__Bacteroidia;o__Bacteroidales;f__Prevotellaceae;; | 0    | 0    |
| L6 | k__Bacteria;p__Bacteroidetes;c__Bacteroidia;o__Bacteroidales;f__Prevotellaceae;; | 28.6 | 1.57 |
| L6 | k__Bacteria;p__Bacteroidetes;c__Bacteroidia;o__Bacteroidales;f__RF16;g__         | 0    | 0    |
| L6 | k__Bacteria;p__Bacteroidetes;c__Bacteroidia;o__Bacteroidales;f__Rikenellaceae;g  | 0.04 | 0.12 |
| L6 | k__Bacteria;p__Bacteroidetes;c__Bacteroidia;o__Bacteroidales;f__Rikenellaceae;g  | 0    | 0    |
| L6 | k__Bacteria;p__Bacteroidetes;c__Bacteroidia;o__Bacteroidales;f__S24-7;g__        | 3.04 | 8.36 |
| L6 | k__Bacteria;p__Bacteroidetes;c__Bacteroidia;o__Bacteroidales;f__[Barnesiellaceae | 0    | 0    |
| L6 | k__Bacteria;p__Bacteroidetes;c__Bacteroidia;o__Bacteroidales;f__[Odoribacterace  | 5.33 | 6.64 |
| L6 | k__Bacteria;p__Bacteroidetes;c__Bacteroidia;o__Bacteroidales;f__[Odoribacterace  | 0.01 | 0    |
| L6 | k__Bacteria;p__Bacteroidetes;c__Bacteroidia;o__Bacteroidales;f__[Paraprevotella  | 0.01 | 0.11 |
| L6 | k__Bacteria;p__Bacteroidetes;c__Bacteroidia;o__Bacteroidales;f__[Paraprevotella  | 0.19 | 0.03 |
| L6 | k__Bacteria;p__Bacteroidetes;c__Bacteroidia;o__Bacteroidales;f__[Paraprevotella  | 0    | 0    |
| L6 | k__Bacteria;p__Bacteroidetes;c__Bacteroidia;o__Bacteroidales;f__[Paraprevotella  | 0.01 | 0.01 |
| L6 | k__Bacteria;p__Bacteroidetes;c__Bacteroidia;o__Bacteroidales;f__[Paraprevotella  | 0.11 | 0.77 |
| L6 | k__Bacteria;p__Bacteroidetes;c__Bacteroidia;o__Bacteroidales;f__p-2534-18B5;g_   | 0.3  | 0.49 |
| L6 | k__Bacteria;p__Bacteroidetes;c__Cytophagia;o__Cytophagales;f__Cytophagaceae;     | 0    | 0    |
| L6 | k__Bacteria;p__Bacteroidetes;c__Cytophagia;o__Cytophagales;f__[Amoebophilace     | 0    | 0    |
| L6 | k__Bacteria;p__Bacteroidetes;c__Flavobacteriia;o__Flavobacteriales;f__Flavobacte | 0    | 0    |
| L6 | k__Bacteria;p__Bacteroidetes;c__Flavobacteriia;o__Flavobacteriales;f__Flavobacte | 0    | 0    |
| L6 | k__Bacteria;p__Bacteroidetes;c__Flavobacteriia;o__Flavobacteriales;f__[Weeksell  | 0.01 | 0    |
| L6 | k__Bacteria;p__Bacteroidetes;c__Flavobacteriia;o__Flavobacteriales;f__[Weeksell  | 0    | 0    |
| L6 | k__Bacteria;p__Bacteroidetes;c__Flavobacteriia;o__Flavobacteriales;f__[Weeksell  | 0    | 0    |
| L6 | k__Bacteria;p__Bacteroidetes;c__Flavobacteriia;o__Flavobacteriales;f__[Weeksell  | 0    | 0    |
| L6 | k__Bacteria;p__Bacteroidetes;c__Flavobacteriia;o__Flavobacteriales;f__[Weeksell  | 0    | 0    |
| L6 | k__Bacteria;p__Bacteroidetes;c__Sphingobacteriia;o__Sphingobacteriales;f__Sphir  | 0    | 0    |
| L6 | k__Bacteria;p__Bacteroidetes;c__Sphingobacteriia;o__Sphingobacteriales;f__Sphir  | 0    | 0    |
| L6 | k__Bacteria;p__Bacteroidetes;c__[Saprospirae];o__[Saprospirales];f__Chitinophag  | 0    | 0    |
| L6 | k__Bacteria;p__Bacteroidetes;c__[Saprospirae];o__[Saprospirales];f__Chitinophag  | 0    | 0.01 |
| L6 | k__Bacteria;p__Bacteroidetes;c__[Saprospirae];o__[Saprospirales];f__Chitinophag  | 0    | 0    |
| L6 | k__Bacteria;p__Chlamydiae;c__Chlamydiia;o__Chlamydiales;f__Chlamydiaceae;g__     | 0    | 0    |
| L6 | k__Bacteria;p__Chloroflexi;c__Anaerolineae;o__Anaerolineales;f__Anaerolinaceae   | 0    | 0    |
| L6 | k__Bacteria;p__Chloroflexi;c__Anaerolineae;o__Anaerolineales;f__Anaerolinaceae   | 0    | 0    |
| L6 | k__Bacteria;p__Chloroflexi;c__Thermomicrobia;o__JG30-KF-CM45;f__g__              | 0    | 0    |
| L6 | k__Bacteria;p__Cyanobacteria;c__4C0d-2;o__YS2;f__g__                             | 0    | 0    |
| L6 | k__Bacteria;p__Cyanobacteria;c__Chloroplast;o__Streptophyta;f__g__               | 0    | 0    |
| L6 | k__Bacteria;p__Deferribacteres;c__Deferribacteres;o__Deferribacterales;f__Defer  | 0.01 | 0    |
| L6 | k__Bacteria;p__Elusimicrobia;c__Elusimicrobia;o__Elusimicrobiales;f__Elusimicrob | 0    | 0    |
| L6 | k__Bacteria;p__Elusimicrobia;c__Elusimicrobia;o__Elusimicrobiales;f__Elusimicrob | 0    | 0    |
| L6 | k__Bacteria;p__Elusimicrobia;c__Endomicrobia;o__f__g__                           | 0    | 0    |
| L6 | k__Bacteria;p__Fibrobacteres;c__Fibrobacteria;o__Fibrobacterales;f__Fibrobacter  | 0    | 0    |
| L6 | k__Bacteria;p__Firmicutes;c__Bacilli;o__Bacillales;f__g__                        | 0    | 0    |

|    |                                                                                     |      |      |
|----|-------------------------------------------------------------------------------------|------|------|
| L6 | k__Bacteria;p__Firmicutes;c__Bacilli;o__Bacillales;f__Bacillaceae;g__               | 0    | 0    |
| L6 | k__Bacteria;p__Firmicutes;c__Bacilli;o__Bacillales;f__Bacillaceae;g__Anaerobacillu  | 0    | 0    |
| L6 | k__Bacteria;p__Firmicutes;c__Bacilli;o__Bacillales;f__Bacillaceae;g__Anoxybacillus  | 0    | 0    |
| L6 | k__Bacteria;p__Firmicutes;c__Bacilli;o__Bacillales;f__Bacillaceae;g__Bacillus       | 0    | 0    |
| L6 | k__Bacteria;p__Firmicutes;c__Bacilli;o__Bacillales;f__Bacillaceae;g__Salimicrobiun  | 0    | 0    |
| L6 | k__Bacteria;p__Firmicutes;c__Bacilli;o__Bacillales;f__Planococcaceae;g__            | 0    | 0    |
| L6 | k__Bacteria;p__Firmicutes;c__Bacilli;o__Bacillales;f__Planococcaceae;g__Lysinibac   | 0    | 0    |
| L6 | k__Bacteria;p__Firmicutes;c__Bacilli;o__Bacillales;f__Planococcaceae;g__Planomic    | 0    | 0    |
| L6 | k__Bacteria;p__Firmicutes;c__Bacilli;o__Bacillales;f__Planococcaceae;g__Rummeli     | 0    | 0    |
| L6 | k__Bacteria;p__Firmicutes;c__Bacilli;o__Bacillales;f__Planococcaceae;g__Solibacill  | 0    | 0    |
| L6 | k__Bacteria;p__Firmicutes;c__Bacilli;o__Bacillales;f__Planococcaceae;g__Sporosar    | 0    | 0    |
| L6 | k__Bacteria;p__Firmicutes;c__Bacilli;o__Bacillales;f__Staphylococcaceae;g__         | 0    | 0    |
| L6 | k__Bacteria;p__Firmicutes;c__Bacilli;o__Bacillales;f__Staphylococcaceae;g__Jeotg    | 0    | 0    |
| L6 | k__Bacteria;p__Firmicutes;c__Bacilli;o__Bacillales;f__Staphylococcaceae;g__Macro    | 0    | 0    |
| L6 | k__Bacteria;p__Firmicutes;c__Bacilli;o__Bacillales;f__Staphylococcaceae;g__Salini   | 0    | 0    |
| L6 | k__Bacteria;p__Firmicutes;c__Bacilli;o__Bacillales;f__Staphylococcaceae;g__Staph    | 0.02 | 0.01 |
| L6 | k__Bacteria;p__Firmicutes;c__Bacilli;o__Bacillales;f__[Exiguobacteraceae];g__Exigi  | 0    | 0    |
| L6 | k__Bacteria;p__Firmicutes;c__Bacilli;o__Gemellales;f__;g__                          | 0    | 0    |
| L6 | k__Bacteria;p__Firmicutes;c__Bacilli;o__Gemellales;f__Gemellaceae;g__               | 0    | 0    |
| L6 | k__Bacteria;p__Firmicutes;c__Bacilli;o__Gemellales;f__Gemellaceae;g__Gemella        | 0    | 0    |
| L6 | k__Bacteria;p__Firmicutes;c__Bacilli;o__Lactobacillales;f__;g__                     | 0    | 0    |
| L6 | k__Bacteria;p__Firmicutes;c__Bacilli;o__Lactobacillales;f__Aerococcaceae;g__        | 0    | 0    |
| L6 | k__Bacteria;p__Firmicutes;c__Bacilli;o__Lactobacillales;f__Aerococcaceae;g__Aerc    | 0    | 0    |
| L6 | k__Bacteria;p__Firmicutes;c__Bacilli;o__Lactobacillales;f__Aerococcaceae;g__Alka    | 0    | 0    |
| L6 | k__Bacteria;p__Firmicutes;c__Bacilli;o__Lactobacillales;f__Aerococcaceae;g__Alloi   | 0    | 0    |
| L6 | k__Bacteria;p__Firmicutes;c__Bacilli;o__Lactobacillales;f__Aerococcaceae;g__Fack    | 0    | 0.01 |
| L6 | k__Bacteria;p__Firmicutes;c__Bacilli;o__Lactobacillales;f__Carnobacteriaceae;g__    | 0    | 0    |
| L6 | k__Bacteria;p__Firmicutes;c__Bacilli;o__Lactobacillales;f__Carnobacteriaceae;g__(   | 0    | 0    |
| L6 | k__Bacteria;p__Firmicutes;c__Bacilli;o__Lactobacillales;f__Carnobacteriaceae;g__l   | 0    | 0    |
| L6 | k__Bacteria;p__Firmicutes;c__Bacilli;o__Lactobacillales;f__Carnobacteriaceae;g__(   | 0    | 0    |
| L6 | k__Bacteria;p__Firmicutes;c__Bacilli;o__Lactobacillales;f__Carnobacteriaceae;g__l   | 0    | 0    |
| L6 | k__Bacteria;p__Firmicutes;c__Bacilli;o__Lactobacillales;f__Enterococcaceae;g__      | 0    | 0    |
| L6 | k__Bacteria;p__Firmicutes;c__Bacilli;o__Lactobacillales;f__Enterococcaceae;g__En    | 0.02 | 0.03 |
| L6 | k__Bacteria;p__Firmicutes;c__Bacilli;o__Lactobacillales;f__Enterococcaceae;g__Va    | 0    | 0    |
| L6 | k__Bacteria;p__Firmicutes;c__Bacilli;o__Lactobacillales;f__Lactobacillaceae;g__     | 0    | 0    |
| L6 | k__Bacteria;p__Firmicutes;c__Bacilli;o__Lactobacillales;f__Lactobacillaceae;g__Lac  | 2.2  | 2.07 |
| L6 | k__Bacteria;p__Firmicutes;c__Bacilli;o__Lactobacillales;f__Lactobacillaceae;g__Pec  | 0    | 0    |
| L6 | k__Bacteria;p__Firmicutes;c__Bacilli;o__Lactobacillales;f__Leuconostocaceae;g__     | 0    | 0    |
| L6 | k__Bacteria;p__Firmicutes;c__Bacilli;o__Lactobacillales;f__Leuconostocaceae;g__L    | 0    | 0    |
| L6 | k__Bacteria;p__Firmicutes;c__Bacilli;o__Lactobacillales;f__Leuconostocaceae;g__V    | 0    | 0    |
| L6 | k__Bacteria;p__Firmicutes;c__Bacilli;o__Lactobacillales;f__Streptococcaceae;g__     | 0    | 0    |
| L6 | k__Bacteria;p__Firmicutes;c__Bacilli;o__Lactobacillales;f__Streptococcaceae;g__La   | 0    | 0    |
| L6 | k__Bacteria;p__Firmicutes;c__Bacilli;o__Lactobacillales;f__Streptococcaceae;g__St   | 1.71 | 1.1  |
| L6 | k__Bacteria;p__Firmicutes;c__Bacilli;o__Turicibacterales;f__Turicibacteraceae;g__   | 0.02 | 0.02 |
| L6 | k__Bacteria;p__Firmicutes;c__Clostridia;o__;f__;g__                                 | 0    | 0    |
| L6 | k__Bacteria;p__Firmicutes;c__Clostridia;o__Clostridiales;f__;g__                    | 1.96 | 5.83 |
| L6 | k__Bacteria;p__Firmicutes;c__Clostridia;o__Clostridiales;f__Christensenellaceae;g__ | 0.11 | 0.16 |
| L6 | k__Bacteria;p__Firmicutes;c__Clostridia;o__Clostridiales;f__Christensenellaceae;g__ | 0    | 0    |
| L6 | k__Bacteria;p__Firmicutes;c__Clostridia;o__Clostridiales;f__Clostridiaceae;g__      | 0.53 | 0.28 |
| L6 | k__Bacteria;p__Firmicutes;c__Clostridia;o__Clostridiales;f__Clostridiaceae;g__02d   | 0    | 0    |

|    |                                                                              |      |      |
|----|------------------------------------------------------------------------------|------|------|
| L6 | k_Bacteria;p_Firmicutes;c_Clostridia;o_Clostridiales;f_Clostridiaceae;g_Can  | 0    | 0    |
| L6 | k_Bacteria;p_Firmicutes;c_Clostridia;o_Clostridiales;f_Clostridiaceae;g_Clo  | 4.43 | 2.31 |
| L6 | k_Bacteria;p_Firmicutes;c_Clostridia;o_Clostridiales;f_Clostridiaceae;g_Prot | 0    | 0    |
| L6 | k_Bacteria;p_Firmicutes;c_Clostridia;o_Clostridiales;f_Clostridiaceae;g_SME  | 0.14 | 0.07 |
| L6 | k_Bacteria;p_Firmicutes;c_Clostridia;o_Clostridiales;f_Clostridiaceae;g_Sarc | 0    | 0    |
| L6 | k_Bacteria;p_Firmicutes;c_Clostridia;o_Clostridiales;f_Dehalobacteriaceae;g_ | 0    | 0    |
| L6 | k_Bacteria;p_Firmicutes;c_Clostridia;o_Clostridiales;f_Dehalobacteriaceae;g_ | 0    | 0    |
| L6 | k_Bacteria;p_Firmicutes;c_Clostridia;o_Clostridiales;f_EtOH8;g__             | 0    | 0    |
| L6 | k_Bacteria;p_Firmicutes;c_Clostridia;o_Clostridiales;f_Eubacteriaceae;g_An   | 0    | 0    |
| L6 | k_Bacteria;p_Firmicutes;c_Clostridia;o_Clostridiales;f_Eubacteriaceae;g_Pse  | 0.01 | 0    |
| L6 | k_Bacteria;p_Firmicutes;c_Clostridia;o_Clostridiales;f_Lachnospiraceae;g__   | 1.15 | 1.16 |
| L6 | k_Bacteria;p_Firmicutes;c_Clostridia;o_Clostridiales;f_Lachnospiraceae;g_A   | 0    | 0    |
| L6 | k_Bacteria;p_Firmicutes;c_Clostridia;o_Clostridiales;f_Lachnospiraceae;g_B   | 0.05 | 0.04 |
| L6 | k_Bacteria;p_Firmicutes;c_Clostridia;o_Clostridiales;f_Lachnospiraceae;g_B   | 0    | 0    |
| L6 | k_Bacteria;p_Firmicutes;c_Clostridia;o_Clostridiales;f_Lachnospiraceae;g_C   | 0    | 0    |
| L6 | k_Bacteria;p_Firmicutes;c_Clostridia;o_Clostridiales;f_Lachnospiraceae;g_C   | 0.07 | 0.04 |
| L6 | k_Bacteria;p_Firmicutes;c_Clostridia;o_Clostridiales;f_Lachnospiraceae;g_D   | 0.26 | 0.76 |
| L6 | k_Bacteria;p_Firmicutes;c_Clostridia;o_Clostridiales;f_Lachnospiraceae;g_El  | 0    | 0    |
| L6 | k_Bacteria;p_Firmicutes;c_Clostridia;o_Clostridiales;f_Lachnospiraceae;g_La  | 0    | 0    |
| L6 | k_Bacteria;p_Firmicutes;c_Clostridia;o_Clostridiales;f_Lachnospiraceae;g_La  | 0    | 0    |
| L6 | k_Bacteria;p_Firmicutes;c_Clostridia;o_Clostridiales;f_Lachnospiraceae;g_P   | 0    | 0    |
| L6 | k_Bacteria;p_Firmicutes;c_Clostridia;o_Clostridiales;f_Lachnospiraceae;g_R   | 0.01 | 0.07 |
| L6 | k_Bacteria;p_Firmicutes;c_Clostridia;o_Clostridiales;f_Lachnospiraceae;g_Sl  | 0.02 | 0.01 |
| L6 | k_Bacteria;p_Firmicutes;c_Clostridia;o_Clostridiales;f_Lachnospiraceae;g_[F  | 0.3  | 0.81 |
| L6 | k_Bacteria;p_Firmicutes;c_Clostridia;o_Clostridiales;f_Peptococcaceae;g__    | 0    | 0    |
| L6 | k_Bacteria;p_Firmicutes;c_Clostridia;o_Clostridiales;f_Peptococcaceae;g_De   | 0    | 0    |
| L6 | k_Bacteria;p_Firmicutes;c_Clostridia;o_Clostridiales;f_Peptococcaceae;g_Pe   | 0.01 | 0.01 |
| L6 | k_Bacteria;p_Firmicutes;c_Clostridia;o_Clostridiales;f_Peptococcaceae;g_rc   | 0    | 0    |
| L6 | k_Bacteria;p_Firmicutes;c_Clostridia;o_Clostridiales;f_Peptostreptococcacea  | 0.05 | 0.01 |
| L6 | k_Bacteria;p_Firmicutes;c_Clostridia;o_Clostridiales;f_Peptostreptococcacea  | 0    | 0    |
| L6 | k_Bacteria;p_Firmicutes;c_Clostridia;o_Clostridiales;f_Peptostreptococcacea  | 0.13 | 0    |
| L6 | k_Bacteria;p_Firmicutes;c_Clostridia;o_Clostridiales;f_Peptostreptococcacea  | 2.06 | 0.22 |
| L6 | k_Bacteria;p_Firmicutes;c_Clostridia;o_Clostridiales;f_Ruminococcaceae;g__   | 0.62 | 2.71 |
| L6 | k_Bacteria;p_Firmicutes;c_Clostridia;o_Clostridiales;f_Ruminococcaceae;g__   | 0    | 0    |
| L6 | k_Bacteria;p_Firmicutes;c_Clostridia;o_Clostridiales;f_Ruminococcaceae;g__   | 0    | 0.02 |
| L6 | k_Bacteria;p_Firmicutes;c_Clostridia;o_Clostridiales;f_Ruminococcaceae;g__   | 0.48 | 0.49 |
| L6 | k_Bacteria;p_Firmicutes;c_Clostridia;o_Clostridiales;f_Ruminococcaceae;g__   | 0.02 | 0    |
| L6 | k_Bacteria;p_Firmicutes;c_Clostridia;o_Clostridiales;f_Ruminococcaceae;g__   | 0.02 | 0.02 |
| L6 | k_Bacteria;p_Firmicutes;c_Clostridia;o_Clostridiales;f_Ruminococcaceae;g__   | 0.78 | 2.21 |
| L6 | k_Bacteria;p_Firmicutes;c_Clostridia;o_Clostridiales;f_Ruminococcaceae;g__   | 0.08 | 1.32 |
| L6 | k_Bacteria;p_Firmicutes;c_Clostridia;o_Clostridiales;f_Veillonellaceae;g__   | 0.02 | 0.03 |
| L6 | k_Bacteria;p_Firmicutes;c_Clostridia;o_Clostridiales;f_Veillonellaceae;g_Aci | 0.02 | 0.01 |
| L6 | k_Bacteria;p_Firmicutes;c_Clostridia;o_Clostridiales;f_Veillonellaceae;g_An  | 0    | 0    |
| L6 | k_Bacteria;p_Firmicutes;c_Clostridia;o_Clostridiales;f_Veillonellaceae;g_Dia | 1.17 | 0.01 |
| L6 | k_Bacteria;p_Firmicutes;c_Clostridia;o_Clostridiales;f_Veillonellaceae;g_Me  | 0.37 | 0.09 |
| L6 | k_Bacteria;p_Firmicutes;c_Clostridia;o_Clostridiales;f_Veillonellaceae;g_Mit | 0.02 | 0.02 |
| L6 | k_Bacteria;p_Firmicutes;c_Clostridia;o_Clostridiales;f_Veillonellaceae;g_Pha | 1.13 | 1.51 |
| L6 | k_Bacteria;p_Firmicutes;c_Clostridia;o_Clostridiales;f_Veillonellaceae;g_Sel | 0    | 0    |
| L6 | k_Bacteria;p_Firmicutes;c_Clostridia;o_Clostridiales;f_Veillonellaceae;g_Spc | 0    | 0    |
| L6 | k_Bacteria;p_Firmicutes;c_Clostridia;o_Clostridiales;f_Veillonellaceae;g_Suc | 0    | 0    |

|    |                                                                                     |      |      |
|----|-------------------------------------------------------------------------------------|------|------|
| L6 | k__Bacteria;p__Firmicutes;c__Clostridia;o__Clostridiales;f__Veillonellaceae;g__Suc  | 0    | 0    |
| L6 | k__Bacteria;p__Firmicutes;c__Clostridia;o__Clostridiales;f__Veillonellaceae;g__Vei  | 2.25 | 0.05 |
| L6 | k__Bacteria;p__Firmicutes;c__Clostridia;o__Clostridiales;f__[Acidaminobacteracea    | 0    | 0    |
| L6 | k__Bacteria;p__Firmicutes;c__Clostridia;o__Clostridiales;f__[Mogibacteriaceae];g__  | 0.1  | 0.03 |
| L6 | k__Bacteria;p__Firmicutes;c__Clostridia;o__Clostridiales;f__[Mogibacteriaceae];g__  | 0    | 0    |
| L6 | k__Bacteria;p__Firmicutes;c__Clostridia;o__Clostridiales;f__[Mogibacteriaceae];g__  | 0    | 0    |
| L6 | k__Bacteria;p__Firmicutes;c__Clostridia;o__Clostridiales;f__[Tissierellaceae];g__   | 0    | 0    |
| L6 | k__Bacteria;p__Firmicutes;c__Clostridia;o__Clostridiales;f__[Tissierellaceae];g__1- | 0    | 0    |
| L6 | k__Bacteria;p__Firmicutes;c__Clostridia;o__Clostridiales;f__[Tissierellaceae];g__Ar | 0.34 | 0.01 |
| L6 | k__Bacteria;p__Firmicutes;c__Clostridia;o__Clostridiales;f__[Tissierellaceae];g__Fi | 0.02 | 0.01 |
| L6 | k__Bacteria;p__Firmicutes;c__Clostridia;o__Clostridiales;f__[Tissierellaceae];g__G\ | 0    | 0    |
| L6 | k__Bacteria;p__Firmicutes;c__Clostridia;o__Clostridiales;f__[Tissierellaceae];g__Ga | 0    | 0.02 |
| L6 | k__Bacteria;p__Firmicutes;c__Clostridia;o__Clostridiales;f__[Tissierellaceae];g__He | 0    | 0    |
| L6 | k__Bacteria;p__Firmicutes;c__Clostridia;o__Clostridiales;f__[Tissierellaceae];g__Pa | 0    | 0    |
| L6 | k__Bacteria;p__Firmicutes;c__Clostridia;o__Clostridiales;f__[Tissierellaceae];g__Pe | 0.11 | 0    |
| L6 | k__Bacteria;p__Firmicutes;c__Clostridia;o__Clostridiales;f__[Tissierellaceae];g__Ti | 0    | 0    |
| L6 | k__Bacteria;p__Firmicutes;c__Clostridia;o__Clostridiales;f__[Tissierellaceae];g__W  | 0    | 0    |
| L6 | k__Bacteria;p__Firmicutes;c__Clostridia;o__Clostridiales;f__[Tissierellaceae];g__pf | 0    | 0    |
| L6 | k__Bacteria;p__Firmicutes;c__Clostridia;o__SHA-98;f__;g__                           | 0    | 0    |
| L6 | k__Bacteria;p__Firmicutes;c__Erysipelotrichi;o__Erysipelotrichales;f__Erysipelotric | 0.01 | 0.01 |
| L6 | k__Bacteria;p__Firmicutes;c__Erysipelotrichi;o__Erysipelotrichales;f__Erysipelotric | 0.29 | 0.02 |
| L6 | k__Bacteria;p__Firmicutes;c__Erysipelotrichi;o__Erysipelotrichales;f__Erysipelotric | 0    | 0    |
| L6 | k__Bacteria;p__Firmicutes;c__Erysipelotrichi;o__Erysipelotrichales;f__Erysipelotric | 0    | 0    |
| L6 | k__Bacteria;p__Firmicutes;c__Erysipelotrichi;o__Erysipelotrichales;f__Erysipelotric | 0    | 0    |
| L6 | k__Bacteria;p__Firmicutes;c__Erysipelotrichi;o__Erysipelotrichales;f__Erysipelotric | 0    | 0    |
| L6 | k__Bacteria;p__Firmicutes;c__Erysipelotrichi;o__Erysipelotrichales;f__Erysipelotric | 0    | 0    |
| L6 | k__Bacteria;p__Firmicutes;c__Erysipelotrichi;o__Erysipelotrichales;f__Erysipelotric | 0    | 0    |
| L6 | k__Bacteria;p__Firmicutes;c__Erysipelotrichi;o__Erysipelotrichales;f__Erysipelotric | 0.02 | 0.02 |
| L6 | k__Bacteria;p__Firmicutes;c__Erysipelotrichi;o__Erysipelotrichales;f__Erysipelotric | 0.15 | 0.11 |
| L6 | k__Bacteria;p__Firmicutes;c__Erysipelotrichi;o__Erysipelotrichales;f__Erysipelotric | 0.07 | 0.25 |
| L6 | k__Bacteria;p__Fusobacteria;c__Fusobacteriia;o__Fusobacteriales;f__Fusobacteria     | 0.04 | 0.12 |
| L6 | k__Bacteria;p__Fusobacteria;c__Fusobacteriia;o__Fusobacteriales;f__Fusobacteria     | 0    | 0    |
| L6 | k__Bacteria;p__Fusobacteria;c__Fusobacteriia;o__Fusobacteriales;f__Fusobacteria     | 13   | 18.8 |
| L6 | k__Bacteria;p__Fusobacteria;c__Fusobacteriia;o__Fusobacteriales;f__Leptotrichia     | 0    | 0    |
| L6 | k__Bacteria;p__LD1;c__;o__;f__;g__                                                  | 0    | 0    |
| L6 | k__Bacteria;p__Lentisphaerae;c__[Lentisphaeria];o__Victivallales;f__Victivallaceae  | 0    | 0    |
| L6 | k__Bacteria;p__Lentisphaerae;c__[Lentisphaeria];o__Victivallales;f__Victivallaceae  | 0    | 0    |
| L6 | k__Bacteria;p__Lentisphaerae;c__[Lentisphaeria];o__Z20;f__R4-45B;g__                | 0    | 0    |
| L6 | k__Bacteria;p__Planctomycetes;c__Planctomycetia;o__Gemmatales;f__Isosphaera         | 0    | 0    |
| L6 | k__Bacteria;p__Planctomycetes;c__Planctomycetia;o__Pirellulales;f__Pirellulaceae    | 0    | 0.01 |
| L6 | k__Bacteria;p__Proteobacteria;c__Alphaproteobacteria;o__;f__;g__                    | 0    | 0    |
| L6 | k__Bacteria;p__Proteobacteria;c__Alphaproteobacteria;o__BD7-3;f__;g__               | 0    | 0    |
| L6 | k__Bacteria;p__Proteobacteria;c__Alphaproteobacteria;o__Caulobacterales;f__Ca       | 0    | 0    |
| L6 | k__Bacteria;p__Proteobacteria;c__Alphaproteobacteria;o__Caulobacterales;f__Ca       | 0    | 0    |
| L6 | k__Bacteria;p__Proteobacteria;c__Alphaproteobacteria;o__Caulobacterales;f__Ca       | 0    | 0    |
| L6 | k__Bacteria;p__Proteobacteria;c__Alphaproteobacteria;o__Caulobacterales;f__Ca       | 0    | 0    |
| L6 | k__Bacteria;p__Proteobacteria;c__Alphaproteobacteria;o__RF32;f__;g__                | 0    | 0    |
| L6 | k__Bacteria;p__Proteobacteria;c__Alphaproteobacteria;o__Rhizobiales;f__;g__         | 0    | 0    |









|    |                                                                                    |      |      |
|----|------------------------------------------------------------------------------------|------|------|
| L6 | k__Bacteria;p__Proteobacteria;c__Gammaproteobacteria;o__Xanthomonadales;f__        | 0    | 0.02 |
| L6 | k__Bacteria;p__Proteobacteria;c__Gammaproteobacteria;o__Xanthomonadales;f__        | 0    | 0    |
| L6 | k__Bacteria;p__Proteobacteria;c__Gammaproteobacteria;o__Xanthomonadales;f__        | 0    | 0    |
| L6 | k__Bacteria;p__Proteobacteria;c__Gammaproteobacteria;o__Xanthomonadales;f__        | 0    | 0    |
| L6 | k__Bacteria;p__Proteobacteria;c__Gammaproteobacteria;o__Xanthomonadales;f__        | 0    | 0    |
| L6 | k__Bacteria;p__Proteobacteria;c__Gammaproteobacteria;o__Xanthomonadales;f__        | 0    | 0    |
| L6 | k__Bacteria;p__SR1;c__o__f__g__                                                    | 0    | 0    |
| L6 | k__Bacteria;p__Spirochaetes;c__MVP-15;o__PL-11B10;f__g__                           | 0    | 0    |
| L6 | k__Bacteria;p__Spirochaetes;c__Spirochaetes;o__Sphaerochaetales;f__Sphaeroch       | 0.01 | 0    |
| L6 | k__Bacteria;p__Spirochaetes;c__Spirochaetes;o__Spirochaetales;f__Spirochaetace     | 0    | 0    |
| L6 | k__Bacteria;p__Spirochaetes;c__Spirochaetes;o__Spirochaetales;f__Spirochaetace     | 0.03 | 0.03 |
| L6 | k__Bacteria;p__Synergistetes;c__Synergistia;o__Synergistales;f__Dethiosulfovibrio  | 0    | 0    |
| L6 | k__Bacteria;p__Synergistetes;c__Synergistia;o__Synergistales;f__Dethiosulfovibrio  | 0    | 0    |
| L6 | k__Bacteria;p__Synergistetes;c__Synergistia;o__Synergistales;f__Synergistaceae;g__ | 0    | 0.01 |
| L6 | k__Bacteria;p__Synergistetes;c__Synergistia;o__Synergistales;f__Synergistaceae;g__ | 0    | 0    |
| L6 | k__Bacteria;p__Synergistetes;c__Synergistia;o__Synergistales;f__Synergistaceae;g__ | 0    | 0    |
| L6 | k__Bacteria;p__TM6;c__SJA-4;o__f__g__                                              | 0    | 0    |
| L6 | k__Bacteria;p__TM7;c__TM7-3;o__f__g__                                              | 0    | 0    |
| L6 | k__Bacteria;p__TM7;c__TM7-3;o__CW040;f__g__                                        | 0    | 0    |
| L6 | k__Bacteria;p__TM7;c__TM7-3;o__CW040;f__F16;g__                                    | 0    | 0    |
| L6 | k__Bacteria;p__TM7;c__TM7-3;o__EW055;f__g__                                        | 0    | 0    |
| L6 | k__Bacteria;p__Tenericutes;c__Mollicutes;o__Acholeplasmatales;f__g__               | 0    | 0    |
| L6 | k__Bacteria;p__Tenericutes;c__Mollicutes;o__Anaeroplasmatales;f__Anaeroplasm       | 0    | 0    |
| L6 | k__Bacteria;p__Tenericutes;c__Mollicutes;o__Anaeroplasmatales;f__Anaeroplasm       | 0    | 0    |
| L6 | k__Bacteria;p__Tenericutes;c__Mollicutes;o__RF39;f__g__                            | 0.02 | 0.08 |
| L6 | k__Bacteria;p__Tenericutes;c__RF3;o__ML615J-28;f__g__                              | 0    | 0    |
| L6 | k__Bacteria;p__Verrucomicrobia;c__Opitutae;o__Opitiales;f__Opitutaceae;g__         | 0    | 0    |
| L6 | k__Bacteria;p__Verrucomicrobia;c__Opitutae;o__[Cerasicoccales];f__[Cerasicocca     | 0    | 0    |
| L6 | k__Bacteria;p__Verrucomicrobia;c__Verruco-5;o__WCHB1-41;f__RFP12;g__               | 0    | 0    |
| L6 | k__Bacteria;p__Verrucomicrobia;c__Verruco-5;o__WCHB1-41;f__WCHB1-25;g__            | 0    | 0    |
| L6 | k__Bacteria;p__Verrucomicrobia;c__Verrucomicrobiae;o__Verrucomicrobiales;f__       | 0    | 0    |
| L6 | k__Bacteria;p__Verrucomicrobia;c__Verrucomicrobiae;o__Verrucomicrobiales;f__       | 0    | 0    |
| L6 | k__Bacteria;p__WPS-2;c__o__f__g__                                                  | 0    | 0    |
| L6 | k__Bacteria;p__[Thermi];c__Deinococci;o__Deinococcales;f__Deinococcaceae;g__       | 0    | 0    |

| G0001 | G0001 | G0001 | G0001 | G0001 | G0001 | G0001 | G0001 | G0002 | G0002 | G0002 | G0002 | G0002 | G0002 | G0002 |
|-------|-------|-------|-------|-------|-------|-------|-------|-------|-------|-------|-------|-------|-------|-------|
| s003  | s004  | s005  | s006  | s007  | s008  | s009  | s011  | s012  | s013  | s014  | s015  | s016  | s017  | s018  |
| 0     | 0.17  | 0.17  | 0.04  | 0.01  | 0.02  | 0.01  | 0.01  | 0.01  | 0.01  | 0.01  | 0.01  | 0.01  | 0.01  | 0.01  |
| 0     | 0     | 0     | 0     | 0     | 0     | 0     | 0     | 0     | 0     | 0     | 0     | 0     | 0     | 0     |
| 0.88  | 1.51  | 2.03  | 4.88  | 0.19  | 0.46  | 0.58  | 0.53  | 0.19  | 1.1   | 0.26  | 0.54  | 0.51  | 0.42  | 0.65  |
| 44.1  | 43.1  | 43.1  | 31.3  | 52.6  | 53.3  | 38.5  | 38.7  | 54.3  | 51.6  | 57.1  | 38.7  | 46    | 43.8  | 49.4  |
| 0     | 0     | 0     | 0     | 0.04  | 0     | 0     | 0     | 0     | 0     | 0     | 0     | 0     | 0     | 0     |
| 0     | 0.01  | 0     | 0     | 0     | 0     | 0     | 0     | 0     | 0     | 0     | 0     | 0     | 0     | 0     |
| 0     | 0.02  | 0.01  | 0.37  | 0     | 0.01  | 0     | 0     | 0     | 0.01  | 0     | 0     | 0.01  | 0     | 0     |
| 0     | 0     | 0     | 0     | 0     | 0     | 0     | 0     | 0     | 0     | 0     | 0     | 0     | 0     | 0     |
| 0     | 0.03  | 0     | 0     | 0     | 0     | 0     | 0     | 0     | 0     | 0     | 0     | 0     | 0     | 0     |
| 0     | 0.02  | 0.01  | 0     | 0     | 0     | 0     | 0     | 0     | 0     | 0     | 0     | 0     | 0     | 0     |
| 25.6  | 39.3  | 37    | 31.2  | 33.5  | 26.1  | 35.7  | 26.1  | 22.5  | 38.3  | 23.8  | 27.9  | 15.3  | 16.4  | 33.3  |
| 18.6  | 0.58  | 2.92  | 13.6  | 7.25  | 16.2  | 21.6  | 15.4  | 16.6  | 2.69  | 14.8  | 20.4  | 28.1  | 29    | 12.7  |
| 0     | 0     | 0     | 0     | 0     | 0     | 0     | 0     | 0     | 0     | 0     | 0     | 0     | 0     | 0     |
| 0     | 0.22  | 0.15  | 0     | 0     | 0     | 0     | 0     | 0     | 0     | 0.01  | 0     | 0     | 0     | 0     |
| 0.01  | 0.56  | 0.48  | 0.01  | 0     | 0.01  | 0.01  | 0.01  | 0.01  | 0.01  | 0     | 0     | 0     | 0     | 0     |
| 10.8  | 13.3  | 13.2  | 18.5  | 6.36  | 3.87  | 3.53  | 19.2  | 6.28  | 6.18  | 3.98  | 12.3  | 10.1  | 10.3  | 3.94  |
| 0     | 0     | 0     | 0     | 0     | 0     | 0     | 0     | 0     | 0     | 0     | 0     | 0     | 0     | 0     |
| 0     | 0.29  | 0.25  | 0.02  | 0.02  | 0.03  | 0.02  | 0.04  | 0.04  | 0.02  | 0.02  | 0.03  | 0.01  | 0.01  | 0.01  |
| 0     | 0.13  | 0.14  | 0     | 0     | 0     | 0     | 0     | 0     | 0     | 0     | 0     | 0.01  | 0.01  | 0     |
| 0     | 0     | 0     | 0     | 0     | 0     | 0     | 0     | 0     | 0     | 0     | 0     | 0     | 0     | 0     |
| 0.01  | 0.08  | 0.05  | 0.01  | 0     | 0     | 0     | 0     | 0     | 0     | 0     | 0     | 0.01  | 0.01  | 0     |
| 0.01  | 0.61  | 0.41  | 0.08  | 0.04  | 0.03  | 0.03  | 0.04  | 0.03  | 0.09  | 0.03  | 0.05  | 0.01  | 0.02  | 0.01  |
| 0     | 0.09  | 0.06  | 0.01  | 0     | 0     | 0.01  | 0     | 0     | 0     | 0     | 0     | 0.01  | 0     | 0     |
| 0     | 0     | 0     | 0     | 0     | 0     | 0     | 0     | 0     | 0     | 0     | 0     | 0     | 0     | 0     |
| 0     | 0     | 0     | 0     | 0     | 0     | 0     | 0     | 0     | 0     | 0     | 0     | 0     | 0     | 0     |
| 0     | 0     | 0     | 0     | 0     | 0     | 0     | 0     | 0     | 0     | 0     | 0     | 0     | 0     | 0     |
| 0     | 0.11  | 0.14  | 0.04  | 0.01  | 0.01  | 0     | 0.01  | 0.01  | 0.01  | 0.01  | 0.01  | 0.01  | 0.01  | 0.01  |
| 0     | 0.01  | 0     | 0     | 0     | 0     | 0     | 0     | 0     | 0     | 0     | 0     | 0     | 0     | 0     |
| 0     | 0.04  | 0.03  | 0     | 0     | 0     | 0     | 0     | 0     | 0     | 0     | 0     | 0     | 0     | 0     |
| 0     | 0     | 0     | 0     | 0     | 0     | 0     | 0     | 0     | 0     | 0     | 0     | 0     | 0     | 0     |
| 0     | 0     | 0     | 0     | 0     | 0     | 0     | 0     | 0     | 0     | 0     | 0     | 0     | 0     | 0     |
| 0     | 0     | 0.02  | 0     | 0     | 0     | 0     | 0     | 0     | 0     | 0     | 0     | 0     | 0     | 0     |
| 0     | 0     | 0     | 0.01  | 0     | 0     | 0     | 0     | 0     | 0     | 0     | 0     | 0     | 0     | 0     |
| 0     | 0     | 0     | 0     | 0     | 0     | 0     | 0     | 0     | 0     | 0     | 0     | 0     | 0     | 0     |
| 0.04  | 0.03  | 0.14  | 0.66  | 0     | 0.03  | 0.01  | 0     | 0.01  | 0.03  | 0     | 0.01  | 0     | 0     | 0     |
| 0     | 0     | 0     | 0.01  | 0.01  | 0     | 0     | 0.01  | 0     | 0     | 0     | 0     | 0     | 0.01  | 0     |
| 0     | 0     | 0     | 0.01  | 0     | 0     | 0     | 0     | 0     | 0     | 0     | 0     | 0     | 0     | 0     |
| 0     | 0.01  | 0.01  | 0.02  | 0     | 0.01  | 0     | 0     | 0     | 0.01  | 0     | 0     | 0     | 0     | 0     |
| 0     | 0     | 0     | 0     | 0     | 0     | 0     | 0     | 0     | 0     | 0     | 0     | 0     | 0     | 0     |
| 0     | 0.02  | 0     | 0.03  | 0     | 0     | 0     | 0     | 0     | 0     | 0     | 0     | 0     | 0     | 0     |
| 0.09  | 0.39  | 0.15  | 2.29  | 0.06  | 0.05  | 0.03  | 0.02  | 0.02  | 0.03  | 0.01  | 0.06  | 0.07  | 0.05  | 0.04  |













|      |      |      |      |      |      |      |      |      |      |      |      |      |      |      |
|------|------|------|------|------|------|------|------|------|------|------|------|------|------|------|
| 0    | 0.01 | 0    | 0    | 0    | 0    | 0    | 0    | 0    | 0    | 0    | 0    | 0    | 0    | 0    |
| 0    | 0    | 0    | 0    | 0    | 0    | 0    | 0    | 0    | 0    | 0    | 0    | 0    | 0    | 0    |
| 0    | 0    | 0    | 0    | 0    | 0    | 0    | 0    | 0    | 0    | 0    | 0    | 0    | 0    | 0    |
| 0    | 0    | 0    | 0    | 0    | 0    | 0    | 0    | 0    | 0    | 0    | 0    | 0    | 0    | 0    |
| 0    | 0.29 | 0.03 | 0.02 | 0    | 0    | 0    | 0    | 0    | 0    | 0    | 0    | 0    | 0    | 0    |
| 0    | 0    | 0    | 0    | 0    | 0    | 0    | 0    | 0    | 0    | 0    | 0    | 0    | 0    | 0    |
| 0    | 0.03 | 0    | 0    | 0    | 0    | 0    | 0    | 0    | 0    | 0    | 0    | 0    | 0    | 0    |
| 0    | 0.01 | 0    | 0    | 0    | 0    | 0    | 0    | 0    | 0    | 0    | 0    | 0    | 0    | 0    |
| 0    | 0    | 0    | 0    | 0    | 0    | 0    | 0    | 0    | 0    | 0    | 0    | 0    | 0    | 0    |
| 0    | 0    | 0    | 0    | 0    | 0    | 0    | 0    | 0    | 0    | 0    | 0    | 0    | 0    | 0    |
| 0    | 0    | 0    | 0    | 0    | 0    | 0    | 0    | 0    | 0    | 0    | 0    | 0    | 0    | 0    |
| 0    | 0    | 0    | 0    | 0    | 0    | 0    | 0    | 0    | 0    | 0    | 0    | 0    | 0    | 0    |
| 0    | 0    | 0    | 0    | 0    | 0    | 0    | 0    | 0    | 0    | 0    | 0    | 0    | 0    | 0    |
| 0    | 0    | 0    | 0    | 0    | 0    | 0    | 0    | 0    | 0    | 0    | 0    | 0    | 0    | 0    |
| 0    | 0    | 0    | 0    | 0    | 0    | 0    | 0    | 0    | 0    | 0    | 0    | 0    | 0    | 0    |
| 0    | 0.01 | 0    | 0    | 0    | 0    | 0    | 0    | 0    | 0    | 0    | 0    | 0    | 0    | 0    |
| 0    | 0.01 | 0    | 0    | 0    | 0    | 0    | 0    | 0    | 0    | 0    | 0    | 0    | 0    | 0    |
| 0    | 0    | 0    | 0    | 0    | 0    | 0    | 0    | 0    | 0    | 0    | 0    | 0    | 0    | 0    |
| 0    | 0.03 | 0.01 | 0.03 | 0    | 0    | 0    | 0    | 0    | 0    | 0    | 0    | 0    | 0    | 0    |
| 0    | 0    | 0    | 0    | 0    | 0    | 0    | 0    | 0    | 0    | 0    | 0    | 0    | 0    | 0    |
| 0    | 0    | 0    | 0    | 0    | 0    | 0    | 0    | 0    | 0    | 0    | 0    | 0    | 0    | 0    |
| 0    | 0.01 | 0    | 0    | 0    | 0    | 0    | 0    | 0    | 0    | 0    | 0    | 0    | 0    | 0    |
| 0    | 0    | 0    | 0    | 0    | 0    | 0    | 0    | 0    | 0    | 0    | 0    | 0    | 0    | 0    |
| 0    | 0    | 0    | 0    | 0    | 0    | 0    | 0    | 0    | 0    | 0    | 0    | 0    | 0    | 0    |
| 0    | 0    | 0    | 0    | 0    | 0    | 0    | 0    | 0    | 0    | 0    | 0    | 0    | 0    | 0    |
| 0    | 0.05 | 0    | 0    | 0    | 0    | 0    | 0    | 0    | 0    | 0    | 0    | 0    | 0    | 0    |
| 0    | 0    | 0    | 0    | 0    | 0    | 0    | 0    | 0    | 0    | 0    | 0    | 0    | 0    | 0    |
| 0    | 0    | 0    | 0    | 0    | 0    | 0    | 0    | 0    | 0    | 0    | 0    | 0    | 0    | 0    |
| 0    | 0    | 0    | 0    | 0    | 0    | 0    | 0    | 0    | 0    | 0    | 0    | 0    | 0    | 0    |
| 0    | 0    | 0    | 0    | 0    | 0    | 0    | 0    | 0    | 0    | 0    | 0    | 0    | 0    | 0    |
| 0    | 0    | 0    | 0    | 0    | 0    | 0    | 0    | 0    | 0    | 0    | 0    | 0    | 0    | 0    |
| 0    | 0    | 0.01 | 0.04 | 0    | 0    | 0    | 0    | 0    | 0    | 0    | 0    | 0    | 0    | 0    |
| 0    | 0    | 0    | 0    | 0    | 0    | 0    | 0    | 0    | 0    | 0    | 0    | 0    | 0    | 0    |
| 0    | 0    | 0    | 0    | 0    | 0    | 0    | 0    | 0    | 0    | 0    | 0    | 0    | 0    | 0    |
| 0    | 0    | 0    | 0    | 0    | 0    | 0    | 0    | 0    | 0    | 0    | 0    | 0    | 0    | 0    |
| 0    | 0    | 0.01 | 0    | 0    | 0    | 0    | 0    | 0    | 0    | 0    | 0    | 0    | 0    | 0    |
| 0    | 0.02 | 0.01 | 0    | 0    | 0    | 0    | 0    | 0    | 0    | 0    | 0    | 0    | 0    | 0    |
| 0    | 0    | 0    | 0    | 0    | 0    | 0    | 0    | 0    | 0    | 0    | 0    | 0.01 | 0.01 | 0    |
| 0.01 | 0.13 | 0.09 | 0.08 | 0    | 0.01 | 0    | 0    | 0    | 0    | 0    | 0    | 0.01 | 0.01 | 0    |
| 0    | 0    | 0.01 | 0    | 0    | 0    | 0    | 0    | 0    | 0    | 0    | 0    | 0    | 0    | 0    |
| 0    | 0    | 0.01 | 0    | 0    | 0    | 0    | 0    | 0    | 0    | 0    | 0    | 0    | 0    | 0    |
| 0    | 0    | 0    | 0    | 0    | 0    | 0    | 0    | 0    | 0    | 0    | 0    | 0    | 0    | 0    |
| 0    | 0    | 0    | 0    | 0    | 0    | 0    | 0    | 0    | 0    | 0    | 0    | 0    | 0    | 0    |
| 0    | 0    | 0    | 0    | 0    | 0    | 0    | 0    | 0    | 0    | 0    | 0    | 0    | 0    | 0    |
| 1.28 | 0.27 | 1.01 | 0.05 | 0.1  | 0.2  | 0.43 | 0.61 | 1.19 | 0.1  | 0.08 | 0.09 | 0.34 | 0.33 | 1.14 |
| 0    | 0    | 0    | 0    | 0    | 0    | 0    | 0    | 0    | 0    | 0    | 0    | 0    | 0    | 0    |
| 0    | 0    | 0    | 0    | 0    | 0    | 0    | 0    | 0    | 0    | 0    | 0    | 0    | 0    | 0    |
| 0    | 0    | 0    | 0    | 0    | 0    | 0    | 0    | 0    | 0    | 0    | 0    | 0    | 0    | 0    |
| 2.64 | 7.5  | 5.93 | 4.2  | 0.07 | 0.29 | 0.27 | 0.07 | 0.08 | 0.03 | 0.05 | 0.14 | 3.64 | 3.56 | 0.33 |
| 0    | 0    | 0    | 0    | 0    | 0    | 0    | 0    | 0    | 0    | 0    | 0    | 0.01 | 0    | 0    |

|      |      |      |      |      |      |      |      |      |      |      |      |      |      |      |
|------|------|------|------|------|------|------|------|------|------|------|------|------|------|------|
| 0    | 0    | 0    | 0    | 0    | 0    | 0    | 0    | 0    | 0    | 0    | 0    | 0    | 0    | 0    |
| 0    | 0    | 0    | 0    | 0    | 0    | 0    | 0    | 0    | 0    | 0    | 0    | 0    | 0    | 0    |
| 0.03 | 0    | 0    | 0    | 0    | 0    | 0    | 0    | 0    | 0    | 0    | 0    | 0.02 | 0.02 | 0    |
| 0.01 | 0    | 0    | 0    | 0    | 0    | 0    | 0    | 0    | 0    | 0    | 0    | 0.01 | 0.02 | 0    |
| 0.19 | 0.01 | 0.02 | 0    | 0    | 0.01 | 0.01 | 0    | 0.01 | 0    | 0    | 0    | 0.31 | 0.3  | 0.02 |
| 0    | 0    | 0    | 0    | 0    | 0    | 0    | 0    | 0    | 0    | 0    | 0    | 0    | 0    | 0    |
| 0.01 | 0    | 0    | 0    | 0    | 0    | 0    | 0    | 0    | 0    | 0    | 0    | 0.01 | 0    | 0    |
| 0.01 | 0    | 0    | 0    | 0    | 0    | 0    | 0    | 0    | 0    | 0    | 0    | 0.02 | 0.01 | 0    |
| 0.81 | 0.04 | 0.09 | 0.01 | 0.01 | 0.01 | 0.02 | 0.01 | 0.01 | 0.01 | 0.01 | 0.02 | 1.32 | 1.61 | 0.1  |
| 0    | 0    | 0    | 0    | 0    | 0    | 0    | 0    | 0    | 0    | 0    | 0    | 0    | 0    | 0    |
| 0.01 | 0    | 0    | 0    | 0    | 0    | 0    | 0    | 0    | 0    | 0    | 0    | 0.01 | 0.01 | 0    |
| 0    | 0    | 0    | 0    | 0    | 0    | 0    | 0    | 0    | 0    | 0    | 0    | 0    | 0    | 0    |
| 0    | 0    | 0    | 0    | 0    | 0    | 0    | 0    | 0    | 0    | 0    | 0    | 0    | 0    | 0    |
| 0    | 0    | 0    | 0    | 0    | 0    | 0    | 0    | 0    | 0    | 0    | 0    | 0    | 0    | 0    |
| 0    | 0    | 0    | 0    | 0    | 0    | 0    | 0    | 0    | 0    | 0    | 0    | 0    | 0    | 0    |
| 0    | 0.03 | 0.02 | 0.01 | 0    | 0    | 0    | 0    | 0    | 0    | 0    | 0    | 0    | 0    | 0    |
| 0    | 0.14 | 0.11 | 0.09 | 0    | 0    | 0.01 | 0    | 0    | 0    | 0    | 0    | 0    | 0    | 0    |
| 0    | 0    | 0    | 0    | 0    | 0    | 0    | 0    | 0    | 0    | 0    | 0    | 0    | 0    | 0    |
| 0    | 0    | 0    | 0    | 0    | 0    | 0    | 0    | 0    | 0    | 0    | 0    | 0    | 0    | 0    |
| 0    | 0    | 0    | 0    | 0    | 0    | 0    | 0    | 0    | 0    | 0    | 0    | 0    | 0    | 0    |
| 0    | 0    | 0    | 0    | 0    | 0    | 0    | 0    | 0    | 0    | 0    | 0    | 0    | 0    | 0    |
| 0    | 0    | 0    | 0    | 0    | 0    | 0    | 0    | 0    | 0    | 0    | 0    | 0    | 0    | 0    |
| 0    | 0    | 0    | 0    | 0    | 0    | 0    | 0    | 0    | 0    | 0    | 0    | 0    | 0    | 0    |
| 0    | 0    | 0    | 0    | 0    | 0    | 0    | 0    | 0    | 0    | 0    | 0    | 0    | 0    | 0    |
| 0    | 0    | 0    | 0    | 0    | 0    | 0    | 0    | 0    | 0    | 0    | 0    | 0    | 0    | 0    |
| 0    | 0    | 0    | 0    | 0    | 0    | 0    | 0    | 0    | 0    | 0    | 0    | 0    | 0    | 0    |
| 0    | 0.03 | 0    | 0.01 | 0    | 0    | 0    | 0    | 0    | 0    | 0    | 0    | 0    | 0    | 0    |
| 0    | 0    | 0    | 0    | 0    | 0    | 0    | 0    | 0    | 0    | 0    | 0    | 0    | 0    | 0    |
| 0    | 0    | 0    | 0    | 0    | 0    | 0    | 0    | 0    | 0    | 0    | 0    | 0    | 0    | 0    |
| 0    | 0    | 0    | 0    | 0    | 0    | 0    | 0    | 0    | 0    | 0    | 0    | 0    | 0    | 0    |
| 0.01 | 0    | 0    | 0    | 0    | 0    | 0    | 0    | 0    | 0    | 0    | 0    | 0    | 0.01 | 0    |
| 0    | 0    | 0    | 0    | 0    | 0    | 0    | 0    | 0    | 0    | 0    | 0    | 0    | 0    | 0    |
| 0    | 0    | 0    | 0    | 0    | 0    | 0    | 0    | 0    | 0    | 0    | 0    | 0    | 0    | 0    |
| 0    | 0    | 0    | 0    | 0    | 0    | 0    | 0    | 0    | 0    | 0    | 0    | 0    | 0    | 0    |
| 0    | 0    | 0    | 0    | 0    | 0    | 0    | 0    | 0    | 0    | 0    | 0    | 0    | 0    | 0    |
| 0    | 0    | 0    | 0    | 0    | 0    | 0    | 0    | 0    | 0    | 0    | 0    | 0    | 0    | 0    |
| 0    | 0    | 0    | 0    | 0    | 0    | 0    | 0    | 0    | 0    | 0    | 0    | 0    | 0    | 0    |
| 0    | 0    | 0    | 0    | 0    | 0    | 0    | 0    | 0    | 0    | 0    | 0    | 0    | 0    | 0    |
| 0    | 0    | 0    | 0    | 0    | 0    | 0    | 0    | 0    | 0    | 0    | 0    | 0    | 0    | 0    |
| 0    | 0.01 | 0.01 | 0    | 0.05 | 0    | 0    | 0    | 0    | 0    | 0    | 0    | 0    | 0    | 0    |
| 0.02 | 0.29 | 0.2  | 0.05 | 0    | 0    | 0.03 | 0.01 | 0.01 | 0.06 | 0.02 | 0.05 | 0.01 | 0    | 0.03 |
| 0.64 | 0.06 | 0.13 | 0.06 | 0.8  | 0.55 | 0.3  | 0.04 | 0.07 | 0.01 | 0.03 | 0.02 | 0.2  | 0.18 | 0.14 |
| 2.34 | 1.57 | 1.55 | 0.62 | 1.04 | 0.54 | 1.14 | 0.19 | 0.68 | 2.06 | 1.29 | 0.15 | 1.34 | 1.18 | 1.11 |
| 0    | 0.31 | 0.19 | 0.3  | 0    | 0    | 0    | 0.02 | 0    | 0.04 | 0    | 0.01 | 0    | 0    | 0    |
| 0    | 0.01 | 0    | 0    | 0    | 0    | 0    | 0    | 0    | 0    | 0    | 0    | 0    | 0    | 0    |
| 0    | 0    | 0    | 0    | 0    | 0    | 0    | 0    | 0    | 0    | 0    | 0    | 0    | 0    | 0    |
| 0    | 0    | 0    | 0    | 0    | 0    | 0    | 0    | 0    | 0    | 0    | 0    | 0    | 0    | 0    |
| 0    | 0    | 0    | 0    | 0    | 0    | 0    | 0    | 0    | 0    | 0    | 0    | 0    | 0    | 0    |
| 0.03 | 0.27 | 2.43 | 1.84 | 0.63 | 0.94 | 0.1  | 16.1 | 0.31 | 0.81 | 0.15 | 10.9 | 0.08 | 0.1  | 0.3  |
| 0    | 0    | 0    | 0    | 0    | 0    | 0    | 0    | 0    | 0    | 0    | 0    | 0    | 0    | 0    |
| 0    | 0    | 0    | 0    | 0    | 0    | 0    | 0    | 0    | 0    | 0    | 0    | 0    | 0    | 0    |
| 0    | 0.05 | 0.02 | 0    | 0    | 0    | 0    | 0    | 0    | 0    | 0    | 0    | 0    | 0    | 0    |
| 0    | 0    | 0    | 0    | 0    | 0    | 0    | 0    | 0    | 0    | 0    | 0    | 0    | 0    | 0    |
| 0    | 0    | 0    | 0    | 0    | 0    | 0    | 0    | 0.01 | 0    | 0    | 0    | 0    | 0    | 0    |





| G0002 | G0002 | G0003 | G0003 | G0003 | G0003 | G0003 | G0003 | G0003 | G0003 | G0003_T2 |
|-------|-------|-------|-------|-------|-------|-------|-------|-------|-------|----------|
| s019  | s020  | s021  | s022  | s023  | s024  | s025  | s026  | s027  | s028  | s029     |
| 0     | 2.5   | 0.01  | 0.01  | 0.01  | 0.04  | 0.01  | 0.01  | 0.02  | 0.01  | 0.01     |
| 0     | 0     | 0     | 0     | 0     | 0     | 0     | 0     | 0     | 0     | 0        |
| 0.1   | 0.57  | 0.27  | 0.12  | 0.23  | 0.19  | 0.5   | 1.01  | 0.51  | 0.34  | 0.53     |
| 45    | 21.4  | 32    | 47.2  | 41.6  | 49.6  | 43    | 50.2  | 59.4  | 29.8  | 64.3     |
| 0     | 0     | 0     | 0     | 0     | 0     | 0     | 0     | 0     | 0     | 0        |
| 0     | 0     | 0     | 0     | 0     | 0.01  | 0     | 0     | 0     | 0     | 0        |
| 0     | 0.07  | 0     | 0     | 0     | 0.03  | 0.01  | 0     | 0     | 0     | 0        |
| 0     | 0     | 0     | 0     | 0     | 0     | 0     | 0     | 0     | 0     | 0        |
| 0     | 0.01  | 0     | 0     | 0     | 0     | 0.03  | 0     | 0.02  | 0.01  | 0        |
| 0     | 0.01  | 0     | 0     | 0.01  | 0.12  | 0     | 0     | 0     | 0     | 0        |
| 15.7  | 62.6  | 15.8  | 16.7  | 15.7  | 20.9  | 19.5  | 28.5  | 21.9  | 23.8  | 24.9     |
| 25.6  | 0.84  | 41.1  | 22.4  | 35.2  | 23.9  | 21.8  | 16.5  | 11.1  | 41.7  | 7.67     |
| 0     | 0     | 0     | 0     | 0     | 0     | 0     | 0     | 0     | 0     | 0        |
| 0     | 0.04  | 0     | 0     | 0     | 0.02  | 0     | 0.02  | 0     | 0.02  | 0        |
| 0.01  | 0.07  | 0     | 0     | 0     | 0     | 0     | 0     | 0.01  | 0     | 0        |
| 13.5  | 5.91  | 10.8  | 13.6  | 6.96  | 4.94  | 15    | 3.55  | 6.92  | 4.28  | 2.48     |
| 0     | 0     | 0     | 0     | 0     | 0.03  | 0     | 0     | 0     | 0     | 0        |
| 0.02  | 3.32  | 0.03  | 0.01  | 0.15  | 0.09  | 0.02  | 0.02  | 0.03  | 0.01  | 0.02     |
| 0     | 0.03  | 0     | 0     | 0     | 0     | 0     | 0.22  | 0     | 0     | 0        |
| 0     | 0     | 0     | 0     | 0     | 0     | 0     | 0     | 0     | 0     | 0        |
| 0     | 0.02  | 0.02  | 0     | 0     | 0.01  | 0     | 0     | 0     | 0     | 0        |
| 0.02  | 2.36  | 0.04  | 0.07  | 0.08  | 0.06  | 0.07  | 0.01  | 0.02  | 0.04  | 0.03     |
| 0.02  | 0.23  | 0     | 0     | 0.02  | 0.03  | 0.01  | 0     | 0     | 0     | 0        |
| 0     | 0     | 0     | 0     | 0     | 0.01  | 0     | 0     | 0     | 0     | 0        |
| 0     | 0     | 0     | 0     | 0     | 0     | 0     | 0     | 0     | 0     | 0        |
| 0     | 0     | 0     | 0     | 0     | 0     | 0     | 0     | 0     | 0     | 0        |
| 0     | 2.46  | 0     | 0     | 0.01  | 0.02  | 0.01  | 0.01  | 0.02  | 0.01  | 0.01     |
| 0     | 0     | 0     | 0     | 0     | 0     | 0     | 0     | 0     | 0     | 0        |
| 0     | 0.04  | 0     | 0     | 0     | 0.02  | 0     | 0     | 0     | 0     | 0        |
| 0     | 0     | 0     | 0     | 0     | 0     | 0     | 0     | 0     | 0     | 0        |
| 0     | 0     | 0     | 0     | 0     | 0     | 0     | 0     | 0     | 0     | 0        |
| 0     | 0     | 0     | 0     | 0     | 0     | 0     | 0     | 0     | 0     | 0        |
| 0     | 0     | 0     | 0     | 0     | 0     | 0     | 0     | 0     | 0     | 0        |
| 0     | 0     | 0     | 0     | 0     | 0     | 0     | 0     | 0     | 0     | 0        |
| 0     | 0     | 0     | 0     | 0     | 0     | 0     | 0     | 0     | 0     | 0        |
| 0     | 0     | 0     | 0     | 0     | 0     | 0     | 0     | 0     | 0     | 0        |
| 0     | 0.01  | 0     | 0     | 0     | 0     | 0.01  | 0     | 0     | 0     | 0        |
| 0     | 0     | 0     | 0     | 0     | 0.01  | 0     | 0     | 0     | 0     | 0        |
| 0     | 0     | 0     | 0     | 0     | 0     | 0     | 0     | 0     | 0     | 0        |
| 0     | 0     | 0     | 0     | 0     | 0     | 0     | 0     | 0     | 0     | 0        |
| 0     | 0     | 0     | 0     | 0     | 0     | 0     | 0     | 0     | 0     | 0        |
| 0     | 0     | 0     | 0     | 0     | 0     | 0     | 0     | 0     | 0     | 0        |
| 0.02  | 0.01  | 0.06  | 0.05  | 0.15  | 0.01  | 0.26  | 0.03  | 0.08  | 0.02  | 0.02     |









|      |      |      |      |      |      |      |      |      |      |      |
|------|------|------|------|------|------|------|------|------|------|------|
| 0    | 0    | 0    | 0    | 0    | 0    | 0    | 0    | 0    | 0    | 0    |
| 3.78 | 2.59 | 2.12 | 5.04 | 3.89 | 2.52 | 9.68 | 1.06 | 4.63 | 0.65 | 2.15 |
| 0    | 0    | 0    | 0    | 0    | 0    | 0    | 0    | 0    | 0    | 0    |
| 0.09 | 3.39 | 0.12 | 0.13 | 0.09 | 0.03 | 0.27 | 0.03 | 0.11 | 0.03 | 0.03 |
| 0    | 0.01 | 0    | 0    | 0    | 0    | 0    | 0    | 0    | 0    | 0    |
| 0    | 0.03 | 0.01 | 0    | 0    | 0    | 0    | 0    | 0    | 0    | 0    |
| 0    | 0.04 | 0    | 0    | 0    | 0    | 0    | 0    | 0    | 0    | 0    |
| 0    | 0    | 0    | 0    | 0    | 0    | 0    | 0    | 0    | 0    | 0    |
| 0    | 0.01 | 0    | 0    | 0    | 0    | 0    | 0    | 0    | 0    | 0    |
| 0    | 0.01 | 0    | 0    | 0    | 0    | 0    | 0    | 0.01 | 0    | 0    |
| 1.5  | 1.25 | 1.95 | 0.66 | 0.81 | 0.88 | 0.54 | 0.53 | 1.97 | 0.53 | 1.19 |
| 0    | 0    | 0    | 0    | 0    | 0    | 0    | 0    | 0    | 0    | 0    |
| 0.03 | 0.05 | 0.02 | 0.02 | 0.01 | 0.06 | 0.03 | 0.11 | 0.1  | 0.02 | 0.07 |
| 0    | 0.01 | 0    | 0    | 0    | 0.02 | 0    | 0    | 0    | 0    | 0    |
| 0    | 0.01 | 0    | 0    | 0    | 0    | 0    | 0    | 0    | 0    | 0    |
| 0.03 | 0.07 | 0.04 | 0.03 | 0.06 | 0.1  | 0.02 | 0.01 | 0.16 | 0.01 | 0.09 |
| 0.03 | 0.04 | 0.15 | 0.18 | 0.32 | 0.64 | 0.11 | 0.03 | 0.23 | 0.08 | 0.3  |
| 0    | 0.02 | 0    | 0    | 0.01 | 0.04 | 0    | 0    | 0    | 0    | 0    |
| 0    | 0    | 0    | 0    | 0    | 0    | 0    | 0    | 0    | 0    | 0    |
| 0    | 0.02 | 0    | 0    | 0    | 0    | 0    | 0    | 0    | 0    | 0    |
| 0    | 0    | 0    | 0    | 0    | 0    | 0    | 0    | 0    | 0    | 0    |
| 0    | 0.01 | 0    | 0.01 | 0    | 0.01 | 0.07 | 0    | 0.01 | 0    | 0.03 |
| 0.01 | 2.33 | 0.01 | 0.01 | 0.01 | 0.01 | 0.01 | 0.01 | 0.01 | 0    | 0    |
| 0.14 | 0.08 | 0.31 | 0.33 | 0.31 | 1.56 | 0.47 | 0.22 | 2.05 | 0.21 | 0.85 |
| 0    | 0    | 0    | 0    | 0    | 0    | 0    | 0    | 0    | 0    | 0    |
| 0    | 0    | 0    | 0    | 0    | 0    | 0    | 0    | 0    | 0    | 0    |
| 0    | 0.08 | 0    | 0.01 | 0    | 0    | 0.03 | 0    | 0.01 | 0.01 | 0.01 |
| 0    | 0    | 0    | 0    | 0    | 0    | 0    | 0    | 0    | 0    | 0    |
| 0.01 | 0.05 | 0.01 | 0.05 | 0.01 | 0.01 | 0.01 | 0    | 0.02 | 0.01 | 0    |
| 0    | 0    | 0    | 0    | 0    | 0    | 0    | 0    | 0    | 0    | 0    |
| 0.01 | 0    | 0.01 | 0.02 | 0.09 | 0.06 | 0.08 | 0    | 0.06 | 0.01 | 0.02 |
| 0.11 | 0.03 | 0.19 | 0.36 | 0.1  | 0.59 | 0.41 | 0.11 | 0.23 | 0.02 | 0.06 |
| 1.09 | 10.7 | 0.49 | 0.71 | 0.67 | 2.52 | 0.82 | 0.46 | 1.74 | 0.56 | 1.45 |
| 0    | 0    | 0    | 0    | 0    | 0    | 0    | 0    | 0    | 0    | 0    |
| 0    | 0    | 0    | 0    | 0    | 0    | 0    | 0    | 0.02 | 0.02 | 0    |
| 0.11 | 0.03 | 0.2  | 0.44 | 0.29 | 1.06 | 0.25 | 0.29 | 0.27 | 0.32 | 0.53 |
| 0.01 | 0    | 0.01 | 0.01 | 0    | 0.01 | 0    | 0    | 0.02 | 0    | 0    |
| 0.02 | 0.02 | 0    | 0.01 | 0.01 | 0.01 | 0.01 | 0.01 | 0.02 | 0.02 | 0.9  |
| 0.54 | 0.33 | 1.18 | 0.6  | 0.42 | 1.91 | 0.25 | 0.71 | 1.47 | 0.57 | 0.94 |
| 1.13 | 0.53 | 0.05 | 2.28 | 0.1  | 0.45 | 0.13 | 0.09 | 0.63 | 0.07 | 0.52 |
| 0.02 | 2.76 | 0.02 | 0.01 | 0.06 | 0.01 | 0.04 | 0.05 | 0.03 | 0.02 | 0.02 |
| 0.01 | 1.26 | 0.03 | 0.14 | 0.01 | 0.01 | 0.04 | 0.81 | 0.04 | 0.56 | 0.01 |
| 0    | 0.02 | 0    | 0.02 | 0    | 0    | 0.04 | 0    | 0    | 0    | 0    |
| 0.01 | 0.13 | 0.02 | 0    | 0.03 | 0.01 | 0.01 | 0.18 | 0.02 | 0.02 | 0    |
| 0.04 | 0.6  | 1.66 | 0.13 | 0.07 | 0.05 | 0.1  | 8.96 | 0.11 | 9.55 | 0.06 |
| 0.01 | 0.21 | 0.02 | 0.02 | 0.02 | 0.01 | 0.04 | 2.65 | 0.02 | 0.02 | 0.29 |
| 0.33 | 0.78 | 0.33 | 0.7  | 0.31 | 0.03 | 0.46 | 0.12 | 2.04 | 0.23 | 0.51 |
| 0    | 0.01 | 0    | 0    | 0    | 0    | 0    | 0    | 0    | 0    | 0    |
| 0    | 0    | 0    | 0    | 0    | 0    | 0    | 0    | 0    | 0    | 0    |
| 0    | 0    | 0    | 0    | 0    | 0.03 | 0    | 0    | 0    | 0    | 0    |
